# Supplementary material for: Perspectives of Stakeholders on Technology Use in the Care of Community-Living Older Adults with Dementia: A Systematic Literature Review
Source: Healthcare (Basel). 2019 May 28;7(2):73. doi: 10.3390/healthcare7020073 (PMC6628181; doi:10.3390/healthcare7020073)
Supplement: Supplementary file 1 [file healthcare-07-00073-s001.xlsx]

## Sheet: Table S1
Table S1		Features of primary studies
Author, Year	Country	Stakeholders / study population*	Setting	Description of technology that is studied	Focus of study in case no actual technology is being used/studied	Research design	MMAT study quality
Alwin et al., 2013 [23]	SE	2	At home (sometimes with formal home care).	Various assistive technologies		Quantitative	0.5
				Time orientation, day planning and memory; alarms/security; spatial orientation/management and ADL–personal care; and communication–telephony. For each person, ADL was fitted to situation and preferences.
		Informal caregivers of people with dementia.
Arntzen et al., 2016 [24]	NO	1 and 2	At home.	Various assistive technologies		Qualitative	0.75
				Fitted to challenges and needs. For example: simple remote TV control, simple mobile phone, stove timer, night & day calendar, digital calendar, medicine dispenser with alarm, GPS, speaking watch.
		Young people with dementia and their informal caregivers.
Azad et al., 2016 [25]	CA	1 and 3	At home (in a rural area)	Technology for communication purposes		Quantitative	0.25
				Telemedicine memory disorder clinic in a rural community. Goal of the clinic: to provide timely access to follow-up care including medication management, driving safety assessment, future planning, ongoing support, and other related health concerns.
		Patients with dementia.
		Geriatricians and assessors who managed the clinic during telemedicine.
Burstein et al., 2015 [26]	US	2	At home.		Study investigates informal caregiver’s awareness of existing technologies to understand acceptance of technologies. Diverse examples of assistive technologies were presented to respondents; these included for instance sensor technology, fall detector, GPS tracking device, Paro (robotic therapy seal), internet platform to provide support, social contact system for care recipients, health monitori…	Mixed methods	0.64
		Informal caregivers: nearly all patients’ primary caregivers.
Chiu et al., 2011 [27]	CA	2	At home, receiving support services from adults day program from a not-for-profit community organization.	Support for informal caregivers		Qualitative	0.75
				Information website and a personalized e-mail support intervention. The designated web site content consisted of over 400 pages of information on disease diagnosis and progression, caregiving strategies, and a listing of community resources. Informal caregivers received personalized email support provided by occupational therapists or social workers to manage home safety and difficult behaviors o…
		Informal caregivers with moderate to severe perceived burden, who reported e-mail or internet usage issues and who preferred Chinese communication language.
Chou et al., 2016 [28]	TWN	2	At home, but receiving treatment at the case hospital.	Monitoring system		Qualitative	0.5
				The EverCare TMSS system. System includes personal wireless pendants, fall detectors, bed and chair occupancy sensors, and property exit sensors. The total unit is continually linked to a response center where a consultant can communicate with the care recipient via a hands-free microphone speaker unit and webcam. The consultant can also arrange for home delivery of care services and medical supp…
		Informal caregivers who were primary caregivers of dementia patients.
Cristancho-Lacroix et al., 2016 [29]	FR	2	Intervention aimed at reducing stress among informal caregivers of persons with dementia in a day care center.	Intervention		Mixed methods	0.55
				A web-based psychoeducational program (called Diapason) inspired by a cognitive approach. The program targets (1) caregivers’ beliefs about the illness and their role, (2) caregivers’ skills to manage daily life difficulties, (3) caregivers’ social support and help-seeking behavior to obtain respite or financial support, and to meet and discuss with peers through a forum. Content of intervention:…
		Informal caregivers who scored 12 or higher on the Perceived Stress Scale.
Czarnuch et al., 2011 [30]	CN	2	Person with dementia sharing residence with informal caregivers (n=63), living alone (n=28), living in a long-term care facility (n=8), or unknown (n=7).		The needs of older adults with dementia and their informal caregivers during ADL and the role of intelligent assistive technology in supporting these needs were investigated.	Quantitative	0.75
		Informal caregivers.
Bello-Haas et al., 2014 [31]	CA	1 and 2	At home in a rural and remote area with help from informal caregiver.	Intervention		Mixed Methods	0.6
				Telehealth delivered exercise intervention (twice a week for 4 weeks).
		People with dementia and informal caregivers.
Ekstorm et al., 2015 [32]	SE	1 and 2	At home.	Technology for communication purposes		Mixed methods	0.73
				A communication application installed on a tablet computer: GoTalk NOW (augmentative and alternative communication, AAC)
		One women with dementia and conversational partner.				Single case study
Faucounau et al., 2009 [33]	FR	1 and 2	At home with a personal care attendant.	GPS		Qualitative	0.25
				The device’s functions: geolocation alarms, voluntary alarm (SOS button), automatic alarm when the person goes beyond a pre-set safety zone, automatic alarm detecting long inactivity, automatic alarm detecting falls.
		One man with dementia living at home at his spouse.				Single case study
Gibson et al., 2015 [34]	UK	1 and 2	At home.	Various assistive technologies		Qualitative	0.75
				AT included were 1) formal AT accessed via social care services, 2) AT purchased privately, and 3) ‘do it yourself’. AT used were, for example, GPS location monitoring equipment, community alarms, telecare, clocks, telephones, remote controls, kitchen appliances.
		People with dementia and informal caregivers.
Hastall et al., 2014 [35]	DE	2 and 3	Formal caregivers were recruited at 2 long-term nursing homes. Informal caregivers were recruited through a local dementia service organization.		Asking ICT-related expectations and attitudes. Three scenarios were brought up to hear about their perceived helpfulness and to uncover participant’s criteria for evaluating assistive technologies. (i) An information retrieval system allowing patients to better manage aspects of his/her disease; (ii) A video-based communication system facilitating interaction among patients and carers and offerin…	Qualitative	0.5
		Informal caregivers and formal caregivers.
Jentoft et al., 2014 [36]	NO	1 and 2	At home.	Simple remote control		Qualitative	1
				Synchronized with two old RCs, and programmed with the four to five most preferred channels. The channel logos were marked on large buttons. In addition, there was an on/off button and scrolling buttons for sound and channels.
		Young people with dementia and their informal caregivers.
Kearns et al., 2007 [37]	US	1, 2 and 3	Clients and formal caregivers recruited via nursing homes. However, focus of the article is on people with dementia living in the community.		Investigating opinions regarding potential effectiveness of existing technologies for managing wandering as well as the elements that such technologies should possess.	Qualitative	0.5
		Residents of nursing home. Informal caregivers of people with dementia living at home. Formal caregivers: home healthcare staff, long term care staff, and medical surgical staff.
Kerssens et al., 2015 [38]	US	1 and 2	At home or living independently (ranging from private home to independent living cottage or apartment within a retirement community).	Support for people with dementia		Quantitative	0.75
				A touchscreen computer (‘Companion’) containing rich audiovisual programs that combine images, music, and messages from trusted individuals that are relevant and pleasing to the care recipient and thus engages him or her meaningfully and positively. For instance, personal photos and videos, using the voices of loved ones to make announcements or recount personal stories. Also, cues and primes for…
		People with dementia and (their) informal caregivers (married couples).
Kim et al., 2015 [39]	US	2	Unclear whether all people with dementia were community-dwelling or not.	Support for informal caregivers		Quantitative	0.75
				Evaluation whether and how informal caregivers use internet websites to find information and resources in any way related to being an informal caregivers for a person with dementia. This was defined as internet-based resources for health- and caregiving-related purposes.
		Informal caregivers.
Landau et al., 2010 [40]	IL	2 and 3	No specific setting.		During the focus groups, respondents were presented a vignette and afterwards an explanation regarding the characteristics of electronic tracking of persons with dementia using GPS systems. GPS was presented as a tracking device and a wristwatch that would provide exact information about the wearer’s location in real-time. The online information about the wearer’s outdoor mobility would be availa…	Qualitative	0.75
		Informal caregivers and formal caregivers (psychiatrists, geriatricians, nurses, social workers, dance therapists, and occupational therapists).	Informal caregivers recruited via support groups.
			Formal caregivers from a psychogeriatric center.
Landau et al., 2011 [41]	IL	1, 2, and 3	No specific setting.		GPS for tracking persons with dementia. The stakeholders were asked the importance of each of the following persons / team to make the decision to use GPS among people with dementia: (1) the person with dementia; (2) his or her spouse; (3) his or her children; (4) the family member who is most involved in the care of the person with dementia; (5) the family physician; (6) a psychiatrist, geriatri…	Quantitative	0.5
		Cognitively intact older adults, informal caregivers of people with dementia, formal caregivers (physicians, nurses, dieticians, occupational therapists).	Recruitment of informal caregivers via support groups and formal caregivers through attendance in a conference.
Landau et al., 2009 [42]	IL	2 and 3	No specific setting.		Measuring attitudes towards the use of GPS and RFID tracking device for persons with dementia.	Quantitative	0.5
		Informal caregivers and formal caregivers (social workers, occupational therapists, managers, nurses, doctors, psychologists, dieticians).	Recruitment of informal caregivers via support groups. Formal caregivers through attendance to a conference, in a psychogeriatric clinic and attendance in a course.
Lindqvist et al., 2013 [43]	SE	1 and 2	At home, mainly living with someone. Recruitment via clinic for memory investigation, a municipality and Alzheimer’s association.	Various assistive technologies		Qualitative	0.75
				Provision of AT was based on the person with dementia’s identified expressed problems, needs, and desires related to activities that were meaningful to them. Examples of AT provided were item locator, note taker, smart finder, support system, MEMO messenger, electronic calendar, key tag.
		Persons with dementia and informal caregivers.
Lundberg et al., 2014 [44]	SE	2	At home	Support for informal caregivers		Qualitative	0.25
				ICT system (called ACTION) designed to give informal caregiver support and knowledge about issues that occur when taking care of someone with dementia or stroke. A computer with different information programs (Everyday care, Care relations, Assistive devices, Society guide and Culture and leisure). In addition, a videophone connected to a call center where trained personnel can give support or wh…
		Informal caregivers of persons with dementia or stroke.
Mao et al., 2015 [45]	TW	2 and 3	At home. Recruitment via daycare centers and a dementia association.		Investigating context-specific perceived usefulness of different assistive technology devices such as automatic shut-off devices (stove), GPS locators, simple remote control, electronic medication reminder, automatic hand washer, photo button telephone etc.	Qualitative	0.5
		Informal caregivers and formal caregivers (occupational and physical therapists, nurses, social workers).
McCabe et al., 2013 [46]	UK	1 and 2	At home. Recruitment via support group, day center and African Caribbean communities.		Studying views about safe walking through GPS device. GPS device aims to give people with dementia more confidence to go out independently and to help carers locate the person with dementia if needed.	Qualitative	0.5
		People with dementia, older adults who are potential users of GPS and informal caregivers.
Mehrabian et al., 2015 [47]	FR	1 and 2	Geriatric outpatient research unit of a hospital.		Perceptions of the usefulness of different functionalities and willingness to adopt a telecare system were investigated by presenting a potential telecare system. The presented home telecare system and smart house had the following services: detecting some emergencies, providing cognitive stimulation exercises, enabling teleconsultation with professionals and videoconferencing with family and fri…	Mixed methods	0.18
		Persons with dementia and informal caregivers.
Meiland et al., 2012 [48]	NL	1 and 2	Recruitment via memory clinics and day care or meeting centers for persons with dementia.	Support for people with dementia		Mixed methods	0.64
				COGKNOW Day Navigator (CDN) with the following functionalities: support in reminding (agenda, find mobile, pop up reminders), support in social contact (picture dialing), support in daily activities (radio lamp control, music player, voice instructions for daily activity), enhanced feeling of safety (navigation, safety warnings doors, help emergency). In this study, functionalities of the final p…
		Persons with dementia and informal caregivers.	Data collection in NL, UK, SE.
Mulvenna et al., 2017 [49]	UK	1 and 2	At home. People were recruited via a charity for older people in Northern Ireland		Investigating ideas and perspectives on the concept of a video surveillance system for monitoring persons living with dementia at home.	Mixed methods	0.27
		Persons with dementia and informal caregivers.
Nauha et al., 2016 [50]	FI	2 and 3	Assisted living facility (n=5) and home environment (n=4).	Various assistive technologies		Quantitative	0.75
				For example: smart flower stand, safety phone, GPS safety bracelet, reminder with motion sensor, motion-controlled lighting, calendar clock, weighted ball blanket.
		Informal caregivers and formal caregivers (nurses).
Newton et al., 2016 [51]	UK	1, 2 and 4	Community care setting.		Exploring views on assistive technology. Respondents were shown images of assistive technology: community alarm and telecare, GPS location monitoring devices, signage, reminiscence tools, clocks to aid orientation, simplified telephones with pictures, dementia friendly furniture.	Qualitative	0.75
		People with dementia, informal caregivers and GPs.
Nijhof et al., 2013a [52]	NL	1, 2 and 3	At home with home care.	Support for people with dementia		Mixed methods	0.55
				PAL4-dementia system, which is a supportive and social contact technology. The touchscreen provides daily organizer function, video contact with caregivers, memory games, information about dementia, and information for the client about their own village, health, and housekeeping.
		People with dementia, informal caregivers and formal caregivers.
Nijhof et al., 2013b	NL	1, 2 and 3	At home with home care.	Monitoring system		Mixed methods	0.55
				ADlife designed to detect problems before they require emergency intervention. A gateway with an alarm button, and a number of sensors that register the pattern of a person’s behavior within the home.
		People with dementia and informal and formal caregivers (i.e. nurses, occupational therapist, nursing home doctor).
Olsson et al., 2016 [53]	SE	1	At home.		Passive positioning alarm (PPA) based on GPS. Transmitter worn by the person with dementia and a receiver (carried by the spouse). When the person leaves a certain area, an alarm containing a map with red dots was sent to the spouse. Communication also possible via transmitter. This study describes perceptions of PPA among persons with dementia. PPA was demonstrated and participants were able to …	Qualitative	1
		People with dementia.
Pakrasi et al., 2015 [54]	UK & US	1 and 2	At home. Recruitment via an intermediate care residential setting.	Technology for communication purposes		Qualitative	0.25
				Videoconference system with a user interface that was specifically designed for ease of use. Aimed for peer-to-peer conversation. Application was run on a touchscreen computer and the end user needed to touch a picture of the person they wanted to connect to, in order to initiate a video conference.
		People with dementia and informal caregivers.
Pilotto et al., 2011 [55]	IT, ES, GR	2	At home. Recruitment via geriatric units in the hospital, center of innovation and nonprofit organization.		Study investigates needs and preferences of informal caregivers on ICT systems and a smart home. Informal caregivers were shown a video on technological devices and functions that can be installed within the home of person with dementia by the HOPE system.	Quantitative	0.5
		Informal caregivers.
Pot et al., 2015 [57]	NL	2	Informal caregivers were included in the study when they had a certain score on a depression scale or a burden scale.	Intervention		Quantitative	0.5
			The majority of people with dementia (82.5%) were living within the community.	Mastery of Dementia (MoD): internet intervention aimed at decreasing psychological distress (depressive symptoms and anxiety) of informal caregivers of people with dementia. Program consisted of 8 sessions and included cognitive behavioral therapeutic techniques including functional assessment, cognitive restructuring, behavioral activation, sensitization, relaxation, and time-management, supplem…
		Informal caregivers.
Pot et al., 2012 [58]	NL	1 and 2	At home.	GPS		Quantitative	1
				Device has the size of a pager and can be worn on the belt. Tracker sends position to a secured website. Informal caregivers can visit the website and log in anytime to see actual position of the person with dementia and the route on a map. In addition, telephone contact is possible with one push on a button. Device also has a loudspeaker function.
		Person in an early stage of dementia and informal caregivers.
Powell et al., 2010 [59]	UK	2	At home.		Informal caregivers were asked to comment on five vignettes that illustrated applications of networked technologies: 1) remote monitoring such as movement sensors or cameras, 2) smart home technologies such as devices that automatically switch off water or gas, 3) internet health information websites, 4) online medical consultations, 5) peer support by social networking sites.	Qualitative	0.75
		Informal caregivers.
Riikonen et al., 2010 [60]	FI	1, 2 and 3	At home.	Various assistive technologies		Qualitative	0.75
				A range of technologies was installed at home based on individual needs. The installed technologies could be divided into 3 categories: 1) risk preventive technology (e.g., cooker alarms, smoke detectors), 2) assistive technology (e.g., memory aids, medication dispensers), 3) emergency technology (e.g., fall detector alarms, location systems).
		People with dementia and informal caregivers. Formal caregivers (community health care personnel) only assessed impact of technology on ability to continue living independently.
Robinson et al., 2007 [61]	UK	1, 2 and 3	At home.		Investigating perspectives of different stakeholders in the management of wandering in dementia. Informal and formal caregivers were asked to reflect on diverse technologies for monitoring wandering behavior (how useful and acceptable are they, what are ethical problems?). People with dementia were only asked to reflect on track-and-trace and tagging technologies.	Qualitative	0.75
		People with dementia, informal caregivers and formal caregivers (diverse group).
Rosenberg et al., 2010 [62]	SE	2	At home.		Investigatinginformal caregivers’ experiences, feelings and thoughts concerning assistive technologies and their relatives as potential users of these technologies. Pictures of a selection of assistive technologies (e.g. devices for planning and reminders, cell phones, remote control) and a description of the purposes and functions of technologies were given during focus groups.	Qualitative	0.75
		Informal caregivers.
Schaller et al., 2016 [63]	DE	2 and 3	At home with home care or medical care.	Support for informal caregivers		Mixed methods	0.36
				eHealthMonitor Dementia Portal: user-sensitive and interactive Web portal for dementia care. Aim is to increase the use of support services by providing targeted and personalized support for both informal caregivers and professionals. Major functionalities are 1) interactive and individualized provision of information and knowledge, 2) communication with domain experts in dementia.
		Informal caregivers and formal caregivers (medical and social professionals).
Solli et al., 2015 [64]	NO	2 and 3	At home, people with dementia or suffering from stroke.	Support for informal caregivers		Qualitative	0.5
				CMC (computer-mediated communication) network, which is a closed network only accessible to informal caregivers and nurses. The network comprised four services: 1) call center, 2) web forum, 3) the information platform, 4) social meetings (not ICT).
		Informal caregivers and formal caregivers (nurses and nursing assistants).
Torkamanni et al., 2014 [65]	UK	1 and 2	At home. People with dementia or Parkinson’s disease with moderate to mild cognitive impairment.	Support for informal caregivers		Quantitative	0.5
				ALADDIN is a computerized platform designed to offer support and information to informal caregivers. Platform can also be used for distant monitoring by making communication possible between person with dementia, informal caregivers and clinicians. Functionalities of the system: 1) Aladdin TV: providing information and educational material about dementia, musical entertainment, relaxation, and ex…
		People with dementia and informal caregivers.
Werner et al., 2011	IL	3	At home.		Investigating attitudes of social workers and social work students concerning tracking and who should be involved in the decision making process regarding GPS use. A GPS device that was described to study participants comprised of a device the size of a cell phone. By wearing the device and the watch, the elderly person enables designated family caregivers to locate him/her in real time by means …	Quantitative	0.5
		Formal caregivers (social workers and social work students).
White et al., 2014 [66]	IE	2	At home.	GPS		Qualitative	0.5
				Device the size of a cell phone. A website showing the location of the device could be accessed by the informal caregiver either through a computer, an internet-enabled mobile phone, or by telephoning staff at a call-center who would track on their behalf.
		Informal caregivers.
Wilz et al., 2016 [67]	DE	2	At home and not going to day care for more than 3 days per week.	Intervention		Quantitative	0.5
				Evaluation of a short-term (7 sessions) telephone-based cognitive-behavioral intervention for dementia caregivers. Intervention focused on managing the behavior problems and personality changes of the care recipient, reduction of social isolation, assisting in utilization of professional and informal support, stress reduction, emotion regulation, reinforcement of positive activities, and supporti…
		Informal caregivers.
* Stakeholders / study population 1 refers to people with dementia, 2 refers to informal caregivers (e.g. spouses, children), 3 refers to formal caregivers, 4 refers to GPs.

## Sheet: Sheet1
Table S1	Table S2
Author, Year	Author, Year
Alwin et al., 2013 [23]	Alwin et al., 2013 [23]
	Arntzen et al., 2016 [24]
Arntzen et al., 2016 [24]
Azad et al., 2016 [25]	Azad et al., 2016 [ref]
Burstein et al., 2015 [26]
	Burstein et al., 2015 [ref]
Chiu et al., 2011 [27]
	Chiu et al., 2011 [ref]
Chou et al., 2016 [28]
Cristancho-Lacroix et al., 2016 [29]	Chou et al., 2016 [ref]
Czarnuch et al., 2011 [30]
	Cristancho-Lacroix et al., 2016 [ref]
Bello-Haas et al., 2014 [31]	Czarnuch et al., 2011 [ref]
Ekstorm et al., 2015 [32]
	Bello-Haas et al., 2014
Faucounau et al., 2009 [33]
	Ekstorm et al., 2015
Gibson et al., 2015 [34]
Hastall et al., 2014 [35]	Faucounau et al., 2009
Jentoft et al., 2014 [36]
	Gibson et al., 2015
Kearns et al., 2007 [37]
Kerssens et al., 2015 [38]
Kim et al., 2015 [39]
	Hastall et al., 2014
Landau et al., 2010 [40]
Landau et al., 2011 [41]
	Jentoft et al., 2014
Landau et al., 2009 [42]
Lindqvist et al., 2013 [43]	Kearns et al., 2007
Lundberg et al., 2014 [44]
Mao et al., 2015 [45]
	Kerssens et al., 2015
McCabe et al., 2013 [46]
	Kim et al., 2015
Mehrabian et al., 2015 [47]	Landau et al., 2010
Meiland et al., 2012 [48]
	Landau et al., 2011
Mulvenna et al., 2017 [49]	Landau et al., 2009
Nauha et al., 2016 [50]	Lindqvist et al., 2013
Newton et al., 2016 [51]
Nijhof et al., 2013a [52]	Lundberg et al., 2014
Nijhof et al., 2013b
	Mao et al., 2015
Olsson et al., 2016 [53]	McCabe et al., 2013
Pakrasi et al., 2015 [54]
	Mehrabian et al., 2015
Pilotto et al., 2011 [55]
Pot et al., 2015 [57]
	Meiland et al., 2012
Pot et al., 2012 [58]
Powell et al., 2010 [59]
	Mulvenna et al., 2017
Riikonen et al., 2010 [60]
Robinson et al., 2007 [61]	Nauha et al., 2016
Rosenberg et al., 2010 [62]	Newton et al., 2016
Schaller et al., 2016 [63]
	Nijhof et al., 2013a
Solli et al., 2015 [64]
Torkamanni et al., 2014 [65]
	Nijhof et al., 2013b
Werner et al., 2011
	Olsson et al., 2016
White et al., 2014 [66]
Wilz et al., 2016 [67]
	Pakrasi et al., 2015
* Stakeholders / study population 1 refers to people with dementia, 2 refers to informal caregivers (e.g. spouses, children), 3 refers to formal caregivers, 4 refers to GPs.
	Pilotto et al., 2011
	Pot et al., 2015
	Pot et al., 2012
	Powell et al., 2010
	Riikonen et al., 2010
	Robinson et al., 2007
	Rosenberg et al., 2010
	Schaller et al., 2016
	Solli et al., 2015
	Torkamanni et al., 2014
	Werner et al., 2011
	White et al., 2014
	Wilz et al., 2016
	* IC: informal caregivers, PwD: persons with dementia, AT: assistive technologies, GPs: general practitioners, FC: formal caregivers

## Sheet: Table S2
Table S2		Results of perspectives of stakeholders per study
Author, Year	Technology / main objective	Perspective persons with dementia	Perspective informal caregivers	Perspective formal caregivers	Main findings
Alwin et al., 2013 [23]	Various AT.		- Involving IC in intervention process was related to higher significance of the intervention.		Involvement IC in intervention is important.
Arntzen et al., 2016 [24]	Various AT.	- Feeling of mastery important;	- See potential relief in burden and time due to AT;		- Feeling of mastery (PwD);
		- IC important in implementation;	- Successful incorporation required IC to make time and effort to learn AT.		- IC crucial in implementation (takes time and effort of IC);
		- Adjustment to individual capacity and situation is crucial;			- Adjustment of AT to personal situation desirable.
		- AT easier incorporated in daily life when assistance of IC was not needed.
Azad et al., 2016 [25]	Video conferencing.	- Satisfied with session, willing to use video conferencing in future;		- Saves travelling time;	- Useful for remote areas, saving travelling time;
		- Felt understood;		- Enough opportunity to ask questions;	- Hearing loss potential barrier telemedicine;
		- Privacy and confidentiality were respected;		- Appointments met their needs;	- PwD and FC satisfied with telemedicine.
		- Some preferred to see doctor in person, more anxious with video conferencing.		- Sometimes patient nervousness about technology;
				- Some mentioned privacy issues;
				- Hearing loss among PwD was a challenge.
Burstein et al., 2015 [26]	IC awareness and acceptance of various AT.		- Increase safety, reduce worry;		- Safety, less worries (IC);
			- IC should see advantages of AT in daily care routines;		- Higher willingness to use AT when disease progresses (IC);
			- Higher willingness to use AT increase with PwD disease progression.		- Advantage of AT in daily care routine should be clear.
Chiu et al., 2011 [27]	Support for IC.		- Technical support and internet access are necessary;		- Importance technical support;
			- Perceived effort greater in situation of stress, made IC reluctant to use service;		- IC characteristics associated with usage.
			- Usage behaviour associated by personal capacity, family support, social norms, current knowledge, amount of time;
			- Different types of users: some preferred information others more interactive users;
			- Differences between IC who have more experience in caregiving.
Chou et al., 2016 [28]	Monitoring system.		- Problems with adapting in beginning;		- Should fit dementia stage;
			- System better suited to mild than severe dementia;		- Safety (IC);
			- Did help for safety concern but could be improved;		- Sense of comfort (IC).
			- Sense of comfort knowing they can always contact nurses.
Cristancho-Lacroix et al., 2016 [29]	Intervention aimed to decrease stress among IC.		- Content of program should fit stage of dementia, timing should be good;		Timing of intervention is important, should fit situation.
			- Findings about usefulness and opinions about content program.
Czarnuch et al., 2011 [30]	Needs in AT in general.		- AT use should be easy and intuitive;		- Ease of use;
			- AT should adapt to multiple users;		- AT should adapt to multiple users;
			- IC little time to learn to use AT;		- Design of AT (not obtrusive);
			- Are sceptic about support of AT for PwD in ADL tasks;		- IC little time to learn to use AT.
			- Prefer less physically obtrusive AT.
Bello-Haas et al., 2014 [31]	Telehealth exercise intervention.	- Ease of use important;	- Large time commitment;		- Pleasure / fun;
		- Pleasure;	- Preferably exercise mode is adaptable to situation;		- Ease of use;
		- Contact with peers is helpful.	- Space (enough and storage) potential problem.		- Flexible / custom made to situation.
Ekstorm et al., 2015 [32]	Technology for communication purposes.	- PwD and IC positive about use of tablet computer;			- IC needed for support;
		- Communication lengthens, easier to come up with topics to talk about;			- Pleasure / fun.
		- Considerable support by IC needed;
		- Fun to use.
Faucounau et al., 2009 [33]	GPs.	- Visibility of tracker (not too voluminous and should be aesthetic;	- Functioning of tracker: battery, accuracy, accessibility;		- Design of technology;
		- In favor of tracker that is removable;	- Device should nog be stigmatizing;		- Functionalities of technology;
		- Reason to wear it: assurance / feeling of safety of IC;	- More in favour of non-removable system;		- Stigmatization;
		- Limit to freedom.	- Bigger freedom for PwD.		- Safety;
					- Autonomy freedom.
Gibson et al., 2015 [34]	Various AT.	- Dislike wearing device;	- IC have key role in integration in daily routines;		- Timing of introduction is crucial;
		- Feeling technology was unnecessary for them;	- Too little assistance by formal care;		- IC crucial in assistance / fitting into daily routine;
		- Felt devices to control their actions;	- GPS reduce emotional and physical burden of care (more freedom, independence);		- Barrier is shortage of assistance by FC;
		- Continuous assistance needed by IC;	- Timing is crucial: early in disease progress;		- Reducing burden of care IC;
		- Anxiety for devices (sounds, lights);	- Costs are a barrier.		- Costs are a barrier;
		- Ambivalent use: sometimes refusing to wear devices.			- Anxiety among PwD;
					- PwD dislike wearing device;
					- PwD felt technology is unnecessary;
					- PwD felt controlled.
Hastall et al., 2014 [35]	Expectations and attitudes towards various AT.		- Enhance personal freedom and mobility of IC;	- Worries about costs;	- Ease of use;
			- Reduce care-related worries and fears;	- Saving time is expected benefit;	- Barriers: safety, privacy, dehumanized care, costs;
			- Enhance safety and wellbeing of PwD;	- Fear for dehumanized care;	- Facilitators IC personal freedom and mobility, reduced worries and fears, PwD more safety and wellbeing;
			- Not too obtrusive or privacy invading;	- Safety and privacy concerns;	- Facilitator FC saving time.
			- Fear for dehumanized care;	- Ease of use important.
			- Safety and privacy concerns;
			- Ease of use important.
Jentoft et al., 2014 [36]	Simple remote control.	- User friendly design;	- Less worries and lower burden;		- Independence PwD; Values (PwD and IC);
		- Watching TV independently;	- Had to change current habits;		- Less worries / lower burden (IC);
		- Routines and habits difficult to change.	- Independence of PwD valued;		- Barrier is changing habits / routines;
			- Timing of introduction technology is crucial.		- Timing in disease progress important.
Kearns et al., 2007 [37]	Opinions regarding technologies for wandering.	No specific perspectives per stakeholder.			- Concern about costs;
		- Concerns about cost of technology;			- Ease of use;
		- Technology cannot replace caregiver only support them;			- Visibility – stigmatization;
		- Ease of use important;			- Flexible to suit stage of dementia.
		- Not too easy to remove;
		- Visibility in relation with stigma was mentioned;
		- Technology should be flexible to be suited to stage of dementia and circumstances;
		- Concerns about privacy and autonomy only mentioned by a few.
Kerssens et al., 2015 [38]	Support for PwD.	- Not feeling monitored or watched;	- Helped IC, however not saving time or reducing burden of care;		- PwD not feeling monitored or watched;
		- Helped to relax and enjoy life;	- Doing something together was appreciated.		- Inability of PWD to use alone;
		- Inability to use it independently.			- Doing something together appreciated.
Kim et al., 2015 [39]	Support for IC.		The use of internet as resource in caregiving was higher among IC that were younger, higher educated, higher income, fewer hours of caregiving, and being (grand)child of PwD rather than spouse.		Use of internet more dependent on characteristic of IC than on situation / characteristics PwD.
Landau et al., 2010 [40]	Vignette demonstration of GPS system.		- Timing / phase of illness;	- Concern of stigmatization;	- Timing;
			- Safety, reducing stress, peace of mind among IC;	- Concern about functionality and inconvenience of device;	- Stigmatization;
			- Independency / mobility of PwD.	- Concern about decrease family involvement;	- Functionality, inconvenience;
				- Concerned about safety, autonomy, privacy.	- Safety, peace of mind;
					- Independency, mobility;
					- Privacy.
Landau et al., 2011 [41]	Opinion about who makes decision for GPS tracking.		Spouse most appropriate person to make decision.	Spouse most appropriate person to make decision.	Spouse important in making decision for GPS use.
Landau et al., 2009 [42]	Attitudes towards GPS.		- Higher value for own peace of mind and safety of PwD;	Value respect for autonomy PwD higher than IC.	- Safety, peace of mind (mainly IC);
			- Design and functionality of device is important.		- Design, functionality (mainly IC);
					- Respect autonomy (mainly FC).
Lindqvist et al., 2013 [43]	Various AT.	- Decision to use AT: usefulness (high value to activity, and difficulties performing certain tasks);	- IC have different roles;		- Usefulness of AT;
		- Making adjustment to everyday routines;	- Support AT from their viewpoint.		- Making adjustments to everyday routines;
		- Stress reduction and feeling of safety;			- Stress reduction / feeling of safety;
		- Sense of having capacity to use is important;			- Sense of having capacity to use;
		- Trust in AT was important.			- Trust in AT important;
					- Own benefits in support AT (IC).
Lundberg et al., 2014 [44]	Support for IC.		- Videophone and internet activities were most attractive;		Mainly focus on functionalities of system.
			- No reduction in IC stress;
			- Call centre was important resource for technical and social support;
			- Sharing experiences with other IC appreciated;
			- Provides attention to IC.
Mao et al., 2015 [45]	Perceived usefulness of various AT.		- Preferably AT for prevention (risk reduction);	Useful when intuitive interface, offers ease of use and simplifies activities.	- Ease of use;
			- Higher rates of usefulness compared to FC.		- Usefulness of AT important.
McCabe et al., 2013 [46]	Views towards GPS.	- Provides feeling of safety, confidence and security;	- Risk reduction could reduce stress;		- Safety, independence, risk reduction, confidence (IC and PwD);
		- Should not too big in order to minimize stigmatization;	- Design should minimize stigma and prejudice;		- Design should minimise stigmatization (IC and PwD);
		- May improve quality of life;	- Reducing stress among IC;		- Functionalities of technology.
		- Design and functionality are important.	- Safety and independence for PwD;
			- Functionality is important.
Mehrabian et al., 2015 [47]	Perception of usefulness of telecare system for communication.	- Feeling of safety;	- Freedom for IC;		- Feeling to be safe (PwD);
		- Prefer telephone (more familiar) compared to video conference;	- Not all IC have a need to use;		- Familiarity with functionalities important (PwD);
		- Concerns about difficulty and complexity of system;	- Emergency communication most useful functionality;		- Concerns about difficulty to use (PwD);
		- Privacy concerns;	- Concerns about flexibility of the system;		- Privacy concerns (PwD);
		- Costs of system can be a barrier.	- Costs of system can be a barrier.		- Cost concerns (PwD and IC);
					- Freedom (IC);
					- Concern about flexibility system (IC).
Meiland et al., 2012 [48]	Support for PwD.	- Ease of use;	- Design was appreciated		- Design;
		- Design was appreciated;	- Technical instability caused dissatisfaction;		- Technical stability and performance important;
		- Perceived usefulness related to personal preferences and support needs;	- Performance and stability of system important in acceptation;		- Perceived usefulness important;
		- Were able to learn to use system;	- Perceived usefulness of some functions.		- Ease of use.
		- Performance and stability of system important in acceptation.
Mulvenna et al., 2017 [49]	Ideas and perspectives monitoring system.	Allows to live at home and remain independent.	- Reducing anxiety and stress;		- Independence;
			- More freedom for IC;		- Reducing anxiety / stress IC;
			- Respecting privacy is a concern;		- Respecting privacy;
			- Ease of use important.		- More freedom IC;
					- Ease of use.
Nauha et al., 2016 [50]	Various AT.		- Usefulness of different functionalities of divers AT;		- Low complexity / simple AT more useful.
			- Simple AT most useful;
			- More complex AT considered as useful.
Newton et al., 2016 [51]	Views on various AT.	- Need for an independent, trustworthy source for information about AT;	Important implementation AT in daily routine.	- Currently minor role in advice about AT;	- GPs currently almost no role in advice AT use;
		- Not clear which professional is responsible / has a role in AT supply.		- Unclear who to approach for information about AT;	- GPs reluctant to AT use (barriers: reliability, safety, costs);
				- Reluctance in AT use: reliability, safety and costs are barrier;	- IC crucial in implementation AT in daily routine;
				- Feel not their role to stimulate AT use.	- Lack of clear independent advice / info about AT (PwD).
Nijhof et al., 2013a [52]	Support for PwD.	- Pleasure (video call more enjoyable compared to normal phone call);	- Timing in disease progress is important (capable to learn system);	Could save time / costs (replacement physical contact by video contact).	- Timing of introduction technology in disease progress;
		- Fear about breaking the system.	- Expected capability of PwD played a role in participation;		- Pleasure / fun;
			- Own experience with computers was related to ease of use;		- Fear to break system;
			- Learning to use the system takes time;		- Time needed to learn to use technology;
			- Perceived usefulness.		- (Expected) capabilities to use technologies;
					- (Perceived) usefulness is important.
Nijhof et al., 2013b	Monitoring system.	- Fear and anxiety for noises and lights of the system;	- More freedom;	- Timing of installation of system plays a role;	- Timing of introduction technology;
		- System provides feeling of safety and security.	- Sometimes increase in burden since system detects problems;	- Technical problems caused feeling of unreliability.	- Technological problems;
			- Ease of use is important.		- Freedom IC;
					- Ease of use;
					- Anxiety signals among PwD;
					- Provides feeling of safety and security PwD.
Olsson et al., 2016 [53]	Perceptions regarding GPS.	- Feeling of safety and security;			- Safety and security;
		- Freedom and independence;			- Freedom and independence;
		- Concern about costs;			- Concern about costs;
		- Concerns about privacy;			- Privacy issues;
		- Ease of use is important;			- Ease of use;
		- Timing: early stage in order that there is time to learn and become familiar.			- Timing of introduction of GPS.
Pakrasi et al., 2015 [54]	Video conversation with peers.	- Cautious about camera’s (feels like spying);	- Feeling that PwD was satisfied to digitally included;		- Social interactivity increased;
		- Concerns about decreasing frequency of visits IC;	- Easy for communication.		- Greater empowerment and better support;
		- Greater empowerment, better support;			- Inclusion in digital world.
		- Increased level of social interactivity;;
		- Most felt comfortable in digital world.
Pilotto et al., 2011 [55]	Needs and preferences of IC on ICT support system for PwD.		- System should be useful to improve quality of life, quality of care, safety of patients, monitoring of emergency communication;		- Usefulness of system;
			- System considered to be less useful for reduction of specific risks or cognitive rehabilitation;		- Suitability of ICT system for certain patients (age / severity dementia).
			- Timing / system most useful for patients between 75-84 years with moderate dementia;
			- 60-70% willing to work with ICT system mainly for daily assistance, monitoring, tracking, entertainment, communication.
Pot et al., 2015 [57]	Internet intervention aimed to decrease distress among IC.		Usefulness and comprehensibility of training were evaluated.
Pot et al., 2012 [58]	GPS.	- More freedom;	- Afraid loudspeaker may confuse PwD;		- Freedom and independence;
		- Feeling of being in control by tracker;	- More freedom for PwD;		- Less conflict between IC and PwD;
		- Some PwD going outside independent more often with tracker.	- Less conflicts about going outside;		- More time for IC;
			- More time for other things;		- Feeling to be in control among PwD;
			- More rest, less stress;		- Less stress among IC.
			- No change in role overload.
Powell et al., 2010 [59]	IC comment on vignettes of various AT.		- Time, effort and skill to learn to use vs benefits to IC;		Barriers: dehumanized care, costs / responsibility, privacy / autonomy, confusing PwD, time / skill to learn to use AT.
			- AT is impersonal and machine drive instead of human contact;
			- AT should assist and not substitute IC;
			- Balance in privacy, autonomy, safety is important;
			- Barrier: responsibility, ownership and costs;
			- Concerns about confusing PwD.
Riikonen et al., 2010 [60]	Various AT.	- Anxiety and confusion (light automatically switching on);			- Anxiety / confusion;
		- Familiarity with AT or functionality related to greater acceptance;			- Familiarity important;
		- Passive devices most useful / accepted.			- Passive devices more useful / accepted.
Robinson et al., 2007 [61]	Reflections on diverse technologies for wandering (mainly GPS).	- Wearing technology makes them vulnerable for criminals;	- Favored quality of life and independence of PwD above potential risks;	- Fear of litigation – society expects locked door policy;	- Vulnerable for criminals (PwD and IC);
		- Use of technology is confusing, difficult to learn and distracting;	- Useful for peace of mind of IC and reduce time to find PwD;	- Their duty to ensure safety of PwD;	- Difficult to learn (PwD);
		- Concerns that tracking devices are embarrassing;	- Concerns about effect on PwD autonomy and privacy;	- Concerns about over-use of tracking devices instead of more personal approaches.	- Stigmatizing;
		- Should be own choice to wear device;	- Concerns about vulnerability for criminals.		- Privacy and autonomy (PwD and IC);
		- Worried about being monitored all day (dependent on who was doing the monitoring).			- Independence;
					- Peace of mind of IC;
					- Fear of litigation (FC);
					- Ensuring safety is a duty (FC);
					- Concern about over-use (FC).
Rosenberg et al., 2010 [62]	IC experiences, feelings and thought on various AT.		- Safety issues;		- Barriers: safety issues, potential of stigmatization, might weaken abilities of PwD;
			- Active lifestyle of PwD was valued;		- Facilitators: simplicity, flexibility, incorporation in daily habits.
			- AT might weaken PwD own abilities;
			- PwD should accept use of AT;
			- Incorporating AT in daily habit preferable;
			- Simplicity and flexibility of AT important;
			- AT should not be stigmatizing.
Schaller et al., 2016 [63]	Support for IC.		- Saved time, 24 hour access appreciated;	- Provision of longitudinal data;	- Privacy concerns (IC and FC);
			- More empowerment due to (individualized) information;	- Improved documentation of history;	- Advantages for rural communities;
			- Improved communication with FC;	- Improved interaction with other FC;	- Improved communication IC and FC;
			- Concerns about privacy;	- Timely reaction of status changes;	- Empowerment of IC due to information;
			- Concerns about whether; information was up to date (not frequent usage);	- Concerns about privacy;	- Timely reaction to status change among FC.
			- Mentioned improvements in design and functionalities.	- Concerns about whether information was up to date (not frequent usage);
				- Mentioned improvements in design and functionalities;
				- Improved access to care and support for IC in rural areas.
Solli et al., 2015 [64]	Support for IC.		- Communication more flexible and dynamic;	- Strengthening relationships with IC and peers;	- Web communication more flexible dynamic;
			- Web communication for some IC less personal, unnatural.	- Potential to create closeness / distance in relationship;	- Web communication sometimes less personal.
				- Adapted to situation and needs of IC;
				- IC and FC worked together, variation in roles.
Torkamanni et al., 2014 [65]	Support for IC.		- Monitoring of PwD gave IC less anxiety and more confidence;		- Information beneficial for IC;
			- More aware of health PwD;		- More confidence / less anxiety IC.
			- More information about dementia;
			- Quality of life and burden of care lower among intervention group.
Werner et al., 2011	Attitudes of FC concerning GPS.			- Respect for autonomy most important;	- Respect for autonomy;
				- IC peace of mind and safety also mentioned.	- Peace of mind IC.
White et al., 2014 [66]	GPS.		- Safety was prioritized over liberty and autonomy;		- Safety over liberty and autonomy;
			- Protection from harm;		- Freedom for IC and PwD;
			- Freedom and independence important for quality of life PwD;		- Protection and risk reduction;
			- Concerns about visibility and stigmatization;		- Visibility and stigmatization;
			- Can reduce anxiety among IC;		- Less anxiety among IC.
			- More freedom for PwD and IC.
Wilz et al., 2016 [67]	Telephone based cognitive behavioral intervention for IC.		- Evaluation about helpfulness of intervention.
* IC: informal caregivers, PwD: persons with dementia, AT: assistive technologies, GPs: general practitioners, FC: formal caregivers
